# Supplementary material for: The synthesis, characterisation and electronic structure of N-heterocyclic carbene adducts of PI cations
Source: Royal Society of Chemistry journal article supplement (doi:10.1039/b500692a), 2005-01-01
Supplement: b500692a.pdf [file b500692a.pdf]

## Supplementary Information

“The synthesis, characterisation and electronic structure of *N*-heterocyclic carbene adducts of P(I)”

Bobby D. Ellis,<sup>a</sup> C. Adam Dyker,<sup>b</sup> Andreas Decken<sup>c</sup> and Charles L. B. Macdonald\*<sup>a</sup>

<sup>a</sup> *Department of Chemistry and Biochemistry, The University of Windsor, Windsor, Ontario N9B 3P4, Canada. Fax: (519) 973-7098; Tel: (519) 253-3000 ext. 3991; E-mail: cmacd@uwindsor.ca*

<sup>b</sup> *Department of Chemistry, Dalhousie University, Halifax, Nova Scotia B3H 4J3, Canada.*

<sup>c</sup> *Department of Chemistry, University of New Brunswick, Fredericton, New Brunswick E3B 6E2, Canada.*

This package contains a discussion of Lewis-type bonding models, a summary of DFT and semi-empirical calculation results.

## Bonding Models for Phosphamethine Cyanines

Pictured below are several Lewis-type structures that, despite the known limitations of such drawings, may be possibly used to denote the structural properties (and implied bonding models) of imidazolium-based phosphamethine cyanine cations. Model **A** formally contains a  $P^V$  center and is directly analogous to allene; such a model would be consistent with a linear C-P-C framework and NHC rings that are perpendicular to each other. Model **B** formally contains a  $P^{III}$  center and, in the delocalized form **B'**, is the model most commonly drawn for such cations; such a model would be consistent with a bent C-P-C unit, shorter-than-single P-C distances and the  $\pi$ -delocalization should be maximized by a planar structure. Model **C** formally contains a  $P^I$  center, which is emphasized by the donor-acceptor form **C'**, and appears to be the model most consistent with structural features observed in this work; such a model implies a bent C-P-C moiety with single P-C bonds and planar NHC rings that are not necessarily in the C-P-C plane. It should be noted that the electronic structure calculated for **2f** appears to be intermediate between **B'** and **C'**, and is thus consistent with a degree of  $P \rightarrow \text{NHC}$   $\pi$ -backbonding; we have commented previously on the importance of  $P \rightarrow \text{ligand}$   $\pi$ -backbonding in enhancing the stability of  $P^I$  centers.<sup>1</sup>

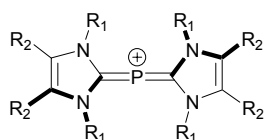

**A**

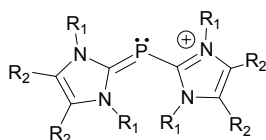

**B**

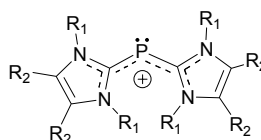

**B'**

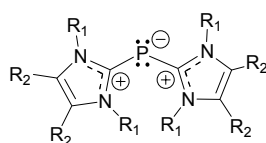

**C**

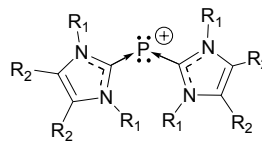

**C'**

## Summary of Density Functional Theory Calculations

Density Functional Theory (DFT) calculations were performed using the Gaussian98<sup>2</sup> suite of programs on a dual Xeon processor Dell Precision workstation. Single point calculations were performed using the B3PW91/6-311+g(3df,2p) level of theory.<sup>3,4</sup> Each model was fully optimized in the point group indicated at the B3PW91/6-31g(d) level of theory; frequency calculations were also performed at the B3PW91/6-31g(d) level to confirm the nature of the stationary points and to obtain the zero point vibrational energy (ZPVE). Absolute energies are reported in hartrees (note:  $E_{\text{total}} = E(\text{B3PW91/6-311+g(3df,2p)}) + \text{ZPVE}$ ), relative energies are given in units of  $\text{kJ mol}^{-1}$  bond lengths are reported in Å and angles are given in degrees. Atomic charges (in atomic units) and Wiberg Bond Indices (WBI) were calculated using the NBO<sup>5,6</sup> method as implemented in Gaussian98 and orbital visualizations were done using MOLDEN<sup>7</sup> or Gaussview 3.0. The occupancy of the 3p orbital on the P atom perpendicular to the C-P-C plane (i.e. the orbital that may become part of the potential  $\pi$  system) is given in units of electrons. The “back-bonding” from the central atom to the NHC ligands ( $\pi$ -delocalization) is demonstrated by the decreased occupancy of the 3p ( $\pi$ ) orbital and is manifested in the appearance of the third highest occupied molecular orbital (HOMO-3) in the models.

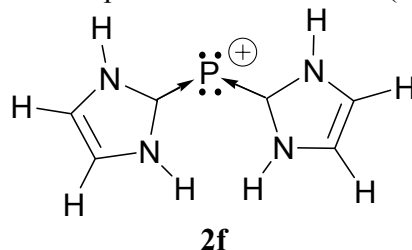

Table S1 – Calculated energies for variants of **2f**.

| Model               | Symmetry                     | N <sub>imag</sub> | E(6-31g(d))  | E(6-311+g(3df,2p)) | ZPVE     | E <sub>total</sub> | Rel. E |
|---------------------|------------------------------|-------------------|--------------|--------------------|----------|--------------------|--------|
| P(NHC) <sub>2</sub> | D <sub>2d</sub>              | 3                 | -793.2483263 | -793.4308977       | 0.149057 | -793.2818407       | 304.13 |
|                     | C <sub>2v</sub> (planar)     | 2                 | -793.3572562 | -793.5403034       | 0.149705 | -793.3905984       | 18.58  |
|                     | C <sub>2v</sub> (non planar) | 2                 | -793.3563459 | -793.5365099       | 0.151137 | -793.3853729       | 32.30  |
|                     | C <sub>2</sub>               | 0                 | -793.3673841 | -793.5485113       | 0.150835 | -793.3976763       | 0.00   |
|                     | C <sub>s</sub>               | 1                 | -793.3635832 | -793.5446418       | 0.150805 | -793.3938368       | 10.08  |
|                     |                              |                   |              |                    |          |                    |        |

Table S2 – Calculated properties for variants of **2f**.

| Model               | Symmetry                     | HOMO     | LUMO     | P 3p $\pi$ pop. | q(P)    | q(C)    | P-C WBI | P-C    | C-P-C  |
|---------------------|------------------------------|----------|----------|-----------------|---------|---------|---------|--------|--------|
| P(NHC) <sub>2</sub> | D <sub>2d</sub>              | -0.32321 | -0.21950 | 1.59212         | 0.19857 | 0.10729 | 1.3162  | 1.7115 | 180.00 |
|                     | C <sub>2v</sub> (planar)     | -0.31751 | -0.16711 | 1.43228         | 0.33389 | 0.08650 | 1.1447  | 1.7911 | 106.52 |
|                     | C <sub>2v</sub> (non planar) | -0.31234 | -0.17184 | 1.77730         | 0.08195 | 0.13080 | 0.9790  | 1.8349 | 97.08  |
|                     | C <sub>2</sub>               | -0.31846 | -0.17020 | 1.49223         | 0.30507 | 0.08109 | 1.1088  | 1.7988 | 98.12  |
|                     | C <sub>s</sub>               | -0.31375 | -0.18075 | 1.58829         | 0.23336 | 0.09377 | 1.1528  | 1.7935 | 97.63  |
|                     |                              |          |          |                 |         | 0.10191 | 0.9754  | 1.8282 |        |

Figure S1. DFT Optimized Geometries of **2f**.

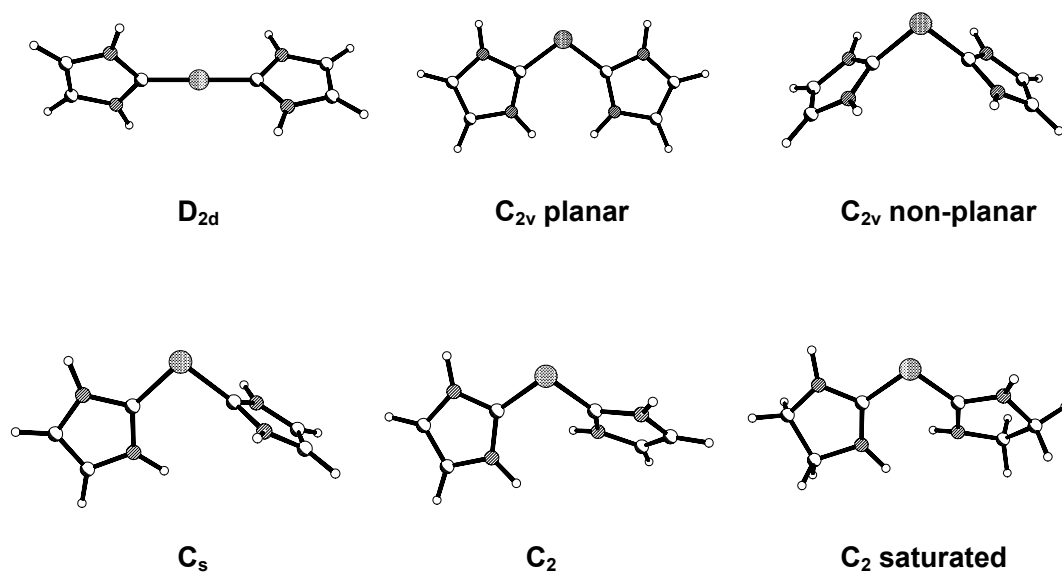

Figure S2. Gaussview<sup>®</sup> depiction of the frontier DFT orbitals of **2f** in  $C_2$  symmetry.

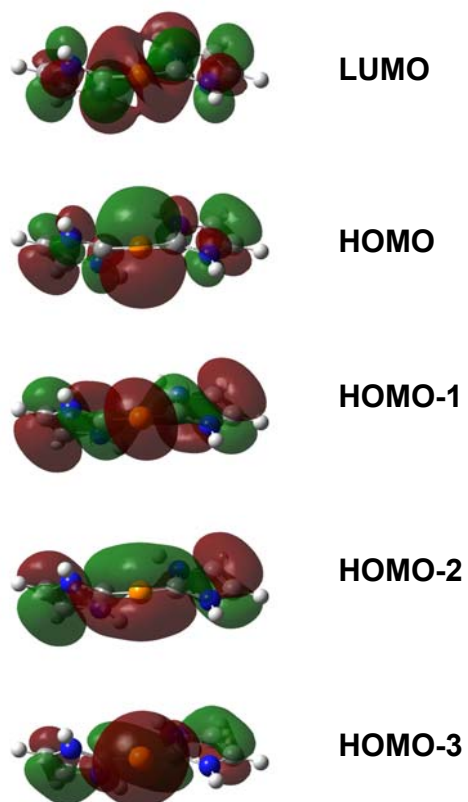

# Supplementary Material (ESI) for Chemical Communications  
# This journal is © The Royal Society of Chemistry 2005

Summary of calculations including optimized geometries (in Cartesian coordinates or Z-matrix format):

**P(NHC)<sub>2</sub>, 2f, D<sub>2d</sub> symmetry:**

```
1\1\GINC-NEIL\SP\RB3PW91\6-311+G(3df,2p)\C6H8N4P1(1+)\CHUCK\31-Aug-2004\0\#\B3PW91/6-311+G(3DF,2P) GEOM=CHECKPOINT SCF=TIGHT #P GFINPUT IOP(6/7=3) TEST\Orbitals of carbene-P-carbene+ D2d\1,1\P,0.,0.,0.\C,0.,0.,1.7115131466\N,-1.0781997147,0.,2.5399101507\N,1.0781997147,0.,2.5399101507\C,-0.6776152093,0.,3.8635130555\C,0.6776152093,0.,3.8635130555\H,-2.0300836626,0.,2.2017038711\H,2.0300836626,0.,2.2017038711\H,-1.3852697338,0.,4.678221434\H,1.3852697338,0.,4.678221434\C,0.,0.,-1.7115131466\N,0.,1.0781997147,-2.5399101507\N,0.,-1.0781997147,-2.5399101507\C,0.,0.6776152093,-3.8635130555\C,0.,-0.6776152093,-3.8635130555\H,0.,2.0300836626,-2.2017038711\H,0.,-2.0300836626,-2.2017038711\H,0.,1.3852697338,-4.678221434\H,0.,-1.3852697338,-4.678221434\Version=x86-Linux-G98RevA.11.1\HF=-793.4308977\RMSD=1.869e-09\Dipole=0.,0.,0.\PG=D02D [O(P1),C2(C1.C1),2SGD(C2H4N2)]\@
```

**P(NHC)<sub>2</sub>, 2f, C<sub>2v</sub> (planar) symmetry:**

```
1\1\GINC-NEIL\SP\RB3PW91\6-311+G(3df,2p)\C6H8N4P1(1+)\CHUCK\01-Sep-2004\0\#\B3PW91/6-311+G(3DF,2P) GEOM=CHECKPOINT SCF=TIGHT #P GFINPUT IOP(6/7=3) TEST\Orbitals of carbene-P-carbene+ C2v planar\1,1\P,-1.3407363707,0.,0.\C,-0.2693162021,0.,1.4353653366\N,-0.8567532597,0.,2.6631783664\N,1.0600099166,0.,1.7159144752\C,0.0776554646,0.,3.6784291427\C,1.2927143042,0.,3.0850715002\H,-1.8594105454,0.,2.796809113\H,1.800189438,0.,1.0362122799\H,-0.203060136,0.,4.7201149085\H,2.288686519,0.,3.4996190299\C,-0.2693162021,0.,-1.4353653366\N,-0.8567532597,0.,-2.6631783664\N,1.0600099166,0.,-1.7159144752\C,0.0776554646,0.,-3.6784291427\C,1.2927143042,0.,-3.0850715002\H,-1.8594105454,0.,-2.796809113\H,1.8001889438,0.,-1.0362122799\H,-0.203060136,0.,-4.7201149085\H,2.288686519,0.,-3.4996190299\Version=x86-Linux-G98RevA.11.1\State=1-A1\HF=-793.5403034\RMSD=5.881e-09\Dipole=0.9983519,0.,0.\PG=C02V [C2(P1),SGV(C6H8N4)]\@
```

**P(NHC)<sub>2</sub>, 2f, C<sub>2v</sub> (non-planar) symmetry:**

```
1\1\GINC-NEIL\SP\RB3PW91\6-311+G(3df,2p)\C6H8N4P1(1+)\CHUCK\01-Sep-2004\0\#\B3PW91/6-311+G(3DF,2P) GEOM=CHECKPOINT SCF=TIGHT #P GFINPUT IOP(6/7=3) TEST\Orbitals of carbene-P-carbene+ C2v not planar\1,1\P,-1.5712645031,0.,0.\C,-0.356332492,0.,1.375129318\N,0.1060110622,-1.0633627663,2.070411406\N,0.1060110622,1.0633627663,2.070411406\C,0.8427461298,-0.6812271074,3.1666282719\C,0.8427461298,0.6812271074,3.1666282719\H,-0.1298159144,-2.0131805427,1.8129610918\H,-0.1298159144,2.0131805427,1.8129610918\H,1.2925010626,-1.3877631163,3.8473318755\H,1.2925010626,1.3877631163,3.8473318755\C,-0.356332492,0.,-1.375129318\N,0.1060110622,1.0633627663,-2.070411406\N,0.1060110622,-1.0633627663,-2.070411406\C,0.8427461298,0.6812271074,-3.1666282719\C,0.8427461298,-0.6812271074,-3.1666282719\H,-0.1298159144,2.0131805427,-1.8129610918\H,-0.1298159144,-2.0131805427,-1.8129610918\H,1.2925010626,1.3877631163,-3.8473318755\H,1.2925010626,-1.3877631163,-3.8473318755\Version=x86-Linux-G98RevA.11.1\State=1-A1\HF=-793.5365099\RMSD=3.539e-09\Dipole=1.7279847,0.,0.\PG=C02V [C2(P1),SGV(C2),X(C4H8N4)]\@
```

**P(NHC)<sub>2</sub>, 2f, C<sub>2</sub> symmetry:**

```
1\1\GINC-NEIL\SP\RB3PW91\6-311+G(3df,2p)\C6H8N4P1(1+)\BOBBY\09-Jun-2004\0\#\B3PW91/6-311+G(3DF,2P) SCF=TIGHT #P GFINPUT IOP
```

# Supplementary Material (ESI) for Chemical Communications  
 # This journal is © The Royal Society of Chemistry 2005

```
(6/7=3) TEST\Si
ngle Point and Molden carbene-P-carbene+\1,1\N,0,0.,0.,1.542085\C,0,0
.,1.358756,0.363378\N,0,0.523246,2.576343,0.647515\N,0,-0.582871,1.523
71,-0.85335\C,0,0.253784,3.491294,-0.352253\C,0,-0.441621,2.825358,-1.
305938\H,0,1.063037,2.762605,1.482719\H,0,-1.171943,0.824282,-1.282546
\H,0,0.584955,4.516809,-0.302512\H,0,-0.839021,3.154272,-2.253572\C,0,
0.,-1.358756,0.363378\N,0,-0.523246,-2.576343,0.647515\N,0,0.582871,-1
.52371,-0.85335\C,0,-0.253784,-3.491294,-0.352253\C,0,0.441621,-2.8253
58,-1.305938\H,0,-1.063037,-2.762605,1.482719\H,0,1.171943,-0.824282,-
1.282546\H,0,-0.584955,-4.516809,-0.302512\H,0,0.839021,-3.154272,-2.2
53572\Version=x86-Linux-G98RevA.11.1\State=1-A\HF=-793.5485113\RMSD=3
.793e-09\Dipole=0.,0.,-1.199182\PG=C02 [C2(P1),X(C6H8N4)]\@
```

P(NHC)<sub>2</sub>, **2f**, C<sub>s</sub> symmetry:

```
1\1\GINC-NEIL\SP\RB3PW91\6-311+G(3df,2p)\C6H8N4P1(1+)\CHUCK\01-Sep-200
4\0\#B3PW91\6-311+G(3DF,2P) GEOM=CHECKPOINT SCF=TIGHT #P GFINPUT IOP
(6/7=3) TEST\Orbitals of carbene-P-carbene+ Cs\1,1\N,-1.5582253831,0
.,-0.0061815184\C,-0.4014521872,0.,1.364431086\N,-0.8157815329,0.,2.65
80063698\N,0.953587581,0.,1.4520631029\C,0.2564180751,0.,3.5342378753\
C,1.3753988344,0.,2.7758380582\H,-1.7889845994,0.,2.9307136083\H,1.568
6335617,0.,0.6533662191\H,0.1244566503,0.,4.6048375766\H,2.4190583837,
0.,3.048350944\C,-0.3301369397,0.,-1.3604645238\N,0.133663307,1.065152
2643,-2.0523907351\N,0.133663307,-1.0651522643,-2.0523907351\C,0.86519
3379,0.6817111685,-3.1512464894\C,0.865193379,-0.6817111685,-3.1512464
894\H,-0.0975706036,2.016716439,-1.7921353666\H,-0.0975706036,-2.01671
6439,-1.7921353666\H,1.312871039,1.388564525,-3.8332939783\H,1.3128710
39,-1.388564525,-3.8332939783\Version=x86-Linux-G98RevA.11.1\State=1-
A\HF=-793.5446418\RMSD=3.961e-09\Dipole=1.3719501,0.,-0.6932712\PG=CS
[SG(C4H4N2P1),X(C2H4N2)]\@
```

All attempts using the unsaturated NHC (**1f**) to optimize stationary points analogous to the cyclopropylphosphenium intermediate suggested by Schmidpeter resulted only in the acyclic structures tabulated above. Similarly, all attempts using the saturated analogue of **1f** to obtain such a structure resulted in acyclic optimized structure; details of the results are summarized below.

Table S3 – Calculated energies and properties for the saturated analogue of **2f**.

| Model                  | Symm           | N <sub>imag</sub> | E(6-31G(d))  | E(6-311g(3df,2p)) | ZPVE    | E <sub>total</sub> | HOMO     | LUMO     |
|------------------------|----------------|-------------------|--------------|-------------------|---------|--------------------|----------|----------|
| P(satNHC) <sub>2</sub> | C <sub>2</sub> | 0                 | -795.7960787 | -795.9767418      | 0.19856 | -795.7781818       | -0.34181 | -0.17856 |
|                        |                |                   | P 3p π pop.  | q(P)              | q(C)    | P-C WBI            | P-C      | C-P-C    |
|                        |                |                   | 1.39527      | 0.37121           | 0.1488  | 1.1559             | 1.7914   | 99.87    |

P(saturated NHC)<sub>2</sub>, C<sub>2</sub> symmetry:

```
1\1\GINC-NEIL\SP\RB3PW91\6-311+G(3df,2p)\C6H12N4P1(1+)\CHUCK\01-Sep-20
04\0\#B3PW91\6-311+G(3DF,2P) GEOM=CHECKPOINT SCF=TIGHT #P GFINPUT IOP
(6/7=3) TEST\Orbitals of saturated carbene-P-carbene+ C2 - close to
C=C\1,1\N,-1.5520610565,0.,0.\C,-0.3989934704,-0.1653101282,1.3609863
761\N,-0.8327202821,-0.5786635089,2.5583702191\N,0.9229310015,0.121541
4348,1.4551860463\C,0.2457290406,-0.6903617421,3.5404238692\C,1.354353
8282,0.1309255237,2.8633571439\H,-1.7237188923,-1.0424731267,2.6730860
```

# Supplementary Material (ESI) for Chemical Communications  
# This journal is © The Royal Society of Chemistry 2005

```
72\H,1.3213861486,0.7897914198,0.807443854\H,0.5318695144,-1.740876417
7,3.6715731578\H,-0.0547885637,-0.2802115527,4.5071498085\H,1.38518322
59,1.1594582972,3.2415641193\H,2.3425150651,-0.3203435732,2.9736937124
\C,-0.3989934704,0.1653101282,-1.3609863761\N,-0.8327202821,0.57866350
89,-2.5583702191\N,0.9229310015,-0.1215414348,-1.4551860463\C,0.245729
0406,0.6903617421,-3.5404238692\C,1.3543538282,-0.1309255237,-2.863357
1439\H,-1.7237188923,1.0424731267,-2.673086072\H,1.3213861486,-0.78979
14198,-0.807443854\H,0.5318695144,1.7408764177,-3.6715731578\H,-0.0547
885637,0.2802115527,-4.5071498085\H,1.3851832259,-1.1594582972,-3.2415
641193\H,2.3425150651,0.3203435732,-2.9736937124\\Version=x86-Linux-G9
8RevA.11.1\State=1-A\HF=-795.9767418\RMSD=2.592e-09\Dipole=0.9676557,0
.,0.\PG=C02 [C2(P1),X(C6H12N4)]\@
```

## Summary of Semi-Empirical Computational Investigations

Fujitsu's CAChe 6.1 suite of programs<sup>8</sup> was used to perform semi-empirical PM3 calculations on selected fully-substituted model cations. The symmetry of each model was not restricted during the optimization procedure ( $C_1$ ); selected bond distances are reported in angstroms and angles are reported in degrees. The B88PW91 energies (in a.u.) listed below were obtained from single-point calculations after replacing the  $R_1$  and  $R_2$  substituents in the optimized geometries with H atoms placed in idealized positions. The relative energies ( $E_{\text{relative}}$ ) caused by the geometrical influences of the substituents on the "core" heavy atoms (i.e. the distortions of the model **2f**) are reported in  $\text{kJ mol}^{-1}$ .

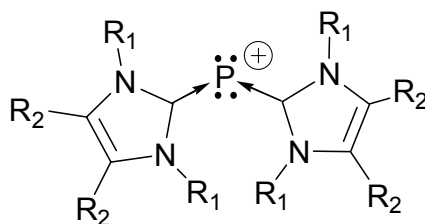

| $R_1$           | $R_2$ | E(B88-PW91)  | $E_{\text{relative}}$ | P-C(1) dist. | P-C(2) dist. | P-C avg. | C-P-C angle |
|-----------------|-------|--------------|-----------------------|--------------|--------------|----------|-------------|
| H               | H     | -793.5862018 | 0.00                  | 1.8581       | 1.8458       | 1.8520   | 106.56      |
| Me              | H     | -793.5804401 | 15.13                 | 1.8832       | 1.8838       | 1.8835   | 104.90      |
| Me              | Me    | -793.5802302 | 15.68                 | 1.8909       | 1.8622       | 1.8766   | 106.29      |
| Et              | H     | -793.5810631 | 13.49                 | 1.8862       | 1.8844       | 1.8853   | 104.07      |
| Et              | Me    | -793.5794749 | 17.66                 | 1.8909       | 1.8850       | 1.8880   | 104.53      |
| <sup>t</sup> Pr | H     | -793.5776455 | 22.46                 | 1.8957       | 1.8785       | 1.8871   | 107.11      |
| <sup>t</sup> Pr | Me    | -793.5794041 | 17.85                 | 1.8950       | 1.8785       | 1.8868   | 105.48      |
| <sup>t</sup> Bu | H     | -793.5683087 | 46.98                 | 1.9415       | 1.9302       | 1.9359   | 111.94      |
| Mes             | H     | -793.5754902 | 28.12                 | 1.8957       | 1.8967       | 1.8962   | 111.08      |

PM3 optimized atomic positions for  $R_1 = \text{H}$ ,  $R_2 = \text{H}$ .

|    |   |             |             |             |
|----|---|-------------|-------------|-------------|
| 1  | N | 0.00000000  | 0.00000000  | 0.00000000  |
| 2  | C | 0.03894400  | 0.75751900  | 1.18767800  |
| 3  | C | 1.35607700  | 1.10033200  | 1.39667400  |
| 4  | N | 2.09151500  | 0.56351900  | 0.32283800  |
| 5  | C | 1.26477000  | -0.12384500 | -0.53885400 |
| 6  | P | 2.01451000  | -1.11700700 | -1.90244200 |
| 7  | C | 0.76069600  | -1.16708200 | -3.27298000 |
| 8  | N | 0.55804200  | -2.33532700 | -3.97198100 |
| 9  | C | -0.23757000 | -2.10324900 | -5.10738400 |
| 10 | C | -0.55286900 | -0.76045800 | -5.10406200 |
| 11 | N | 0.07582700  | -0.19976000 | -3.97759500 |
| 12 | H | -0.82023000 | -0.39874800 | -0.38093300 |
| 13 | H | -0.84195300 | 0.99311400  | 1.79274500  |
| 14 | H | 1.79891700  | 1.67521700  | 2.21598400  |
| 15 | H | 3.07261900  | 0.64179700  | 0.21277600  |
| 16 | H | 0.94775200  | -3.21089900 | -3.72119000 |



# Supplementary Material (ESI) for Chemical Communications  
# This journal is © The Royal Society of Chemistry 2005

|    |   |             |             |             |
|----|---|-------------|-------------|-------------|
| 17 | H | -0.52373100 | -2.87680700 | -5.82724900 |
| 18 | H | -1.15956100 | -0.19268900 | -5.81637000 |
| 19 | H | 0.04321800  | 0.75875300  | -3.73781200 |

Atomic positions used in the single-point B88PW91 calculation of **2f** from R<sub>1</sub> = H, R<sub>2</sub> = H.

|    |   |             |             |             |
|----|---|-------------|-------------|-------------|
| 1  | N | 0.00000000  | 0.00000000  | 0.00000000  |
| 2  | C | 0.03793000  | 0.75821200  | 1.18709500  |
| 3  | C | 1.35502000  | 1.10099500  | 1.39659600  |
| 4  | N | 2.09127400  | 0.56328400  | 0.32360700  |
| 5  | C | 1.26466200  | -0.12383400 | -0.53862500 |
| 6  | P | 2.01415200  | -1.11664400 | -1.90232300 |
| 7  | C | 0.76153700  | -1.16311800 | -3.27388400 |
| 8  | N | 0.55992300  | -2.33181200 | -3.97243400 |
| 9  | C | -0.23696200 | -2.10080600 | -5.10727900 |
| 10 | C | -0.55315700 | -0.75823600 | -5.10474000 |
| 11 | N | 0.07661100  | -0.19634900 | -3.97942100 |
| 12 | H | -0.84538000 | -0.40184700 | -0.40528000 |
| 13 | H | -0.81108900 | 1.02230700  | 1.81758700  |
| 14 | H | 1.75139300  | 1.67767100  | 2.23231900  |
| 15 | H | 3.09848400  | 0.66801300  | 0.20129800  |
| 16 | H | 0.93692400  | -3.24066300 | -3.70362200 |
| 17 | H | -0.54543500 | -2.84001700 | -5.84654300 |
| 18 | H | -1.17134600 | -0.23413600 | -5.83361600 |
| 19 | H | 0.03273100  | 0.78943000  | -3.72113100 |

PM3 optimized atomic positions for R<sub>1</sub> = Me, R<sub>2</sub> = H.

|    |   |             |             |             |
|----|---|-------------|-------------|-------------|
| 1  | N | 0.00000000  | 0.00000000  | 0.00000000  |
| 2  | C | -0.02299600 | 0.92687600  | 1.06141600  |
| 3  | C | 1.14199800  | 1.65795500  | 0.97879700  |
| 4  | N | 1.84698200  | 1.17412400  | -0.13954200 |
| 5  | C | 1.14921300  | 0.15284700  | -0.75255700 |
| 6  | P | 1.92276900  | -0.90758300 | -2.10378900 |
| 7  | C | 0.71669900  | -0.80920700 | -3.54673500 |
| 8  | N | 0.20243100  | -1.93824400 | -4.15205100 |
| 9  | C | -0.49157900 | -1.59979600 | -5.32915000 |
| 10 | C | -0.41014700 | -0.23061400 | -5.45948100 |
| 11 | N | 0.34364700  | 0.23986200  | -4.36566500 |
| 12 | C | 0.35798300  | -3.31307500 | -3.66337300 |
| 13 | C | 0.68605400  | 1.65361900  | -4.17847900 |
| 14 | C | -1.05910100 | -0.99054900 | -0.21861000 |
| 15 | C | 3.15152700  | 1.68965100  | -0.57000600 |
| 16 | H | -0.83471100 | 1.00091700  | 1.79152600  |
| 17 | H | 1.50125600  | 2.46067400  | 1.62984400  |
| 18 | H | -0.98072700 | -2.32839900 | -5.98261100 |
| 19 | H | -0.82014400 | 0.41418600  | -6.24268400 |

# Supplementary Material (ESI) for Chemical Communications  
# This journal is © The Royal Society of Chemistry 2005

|    |   |             |             |             |
|----|---|-------------|-------------|-------------|
| 20 | H | 0.90592900  | -3.29906600 | -2.70389000 |
| 21 | H | 0.92573200  | -3.92015700 | -4.38376300 |
| 22 | H | -0.62543700 | -3.78032200 | -3.51361000 |
| 23 | H | 1.60901500  | 1.74716200  | -3.58481200 |
| 24 | H | 0.84592900  | 2.13794900  | -5.15314800 |
| 25 | H | -0.12333100 | 2.18561500  | -3.65758500 |
| 26 | H | -0.66822200 | -1.84822300 | -0.78757900 |
| 27 | H | -1.44164100 | -1.35629000 | 0.74566600  |
| 28 | H | -1.89720700 | -0.54892700 | -0.77674400 |
| 29 | H | 3.92254200  | 1.47715100  | 0.18487900  |
| 30 | H | 3.10364900  | 2.77659600  | -0.72237100 |
| 31 | H | 3.44177600  | 1.19854900  | -1.51645000 |

Atomic positions used in the single-point B88PW91 calculation of **2f** from R<sub>1</sub> = Me, R<sub>2</sub> = H.

|    |   |             |             |             |
|----|---|-------------|-------------|-------------|
| 1  | N | 0.00000000  | 0.00000000  | 0.00000000  |
| 2  | C | -0.02299600 | 0.92687600  | 1.06141600  |
| 3  | C | 1.14199800  | 1.65795500  | 0.97879700  |
| 4  | N | 1.84698200  | 1.17412400  | -0.13954200 |
| 5  | C | 1.14921300  | 0.15284700  | -0.75255700 |
| 6  | P | 1.92276900  | -0.90758300 | -2.10378900 |
| 7  | C | 0.71669900  | -0.80920700 | -3.54673500 |
| 8  | N | 0.20243100  | -1.93824400 | -4.15205100 |
| 9  | C | -0.49157900 | -1.59979600 | -5.32915000 |
| 10 | C | -0.41014700 | -0.23061400 | -5.45948100 |
| 11 | N | 0.34364700  | 0.23986200  | -4.36566500 |
| 12 | H | -0.72972700 | -0.68775400 | -0.18679300 |
| 13 | H | -0.81131000 | 1.04311700  | 1.80515600  |
| 14 | H | 1.45702700  | 2.45692900  | 1.64998800  |
| 15 | H | 2.74988700  | 1.52956100  | -0.45390900 |
| 16 | H | 0.31049400  | -2.88769000 | -3.79529400 |
| 17 | H | -0.99618600 | -2.28833900 | -6.00692600 |
| 18 | H | -0.84533900 | 0.37299400  | -6.25595100 |
| 19 | H | 0.58085800  | 1.21817600  | -4.20124800 |

PM3 optimized atomic positions for R<sub>1</sub> = Me, R<sub>2</sub> = Me.

|   |   |             |             |             |
|---|---|-------------|-------------|-------------|
| 1 | N | 0.00000000  | 0.00000000  | 0.00000000  |
| 2 | C | 0.30786400  | -0.29817700 | 1.35214800  |
| 3 | C | 1.65399300  | -0.03256800 | 1.52504400  |
| 4 | N | 2.14691800  | 0.40667100  | 0.27381900  |
| 5 | C | 1.13647200  | 0.42118100  | -0.66989100 |
| 6 | P | 1.53091300  | 1.09067700  | -2.36224200 |
| 7 | C | 0.40806500  | 0.16868700  | -3.57244000 |
| 8 | N | 0.57084800  | -1.10055600 | -4.09074300 |
| 9 | C | -0.29429500 | -1.30527600 | -5.18915100 |

# Supplementary Material (ESI) for Chemical Communications  
# This journal is © The Royal Society of Chemistry 2005

|    |   |             |             |             |
|----|---|-------------|-------------|-------------|
| 10 | C | -1.00128600 | -0.12451300 | -5.36143700 |
| 11 | N | -0.55848900 | 0.76380400  | -4.35520500 |
| 12 | C | 1.52057800  | -2.10741500 | -3.60726800 |
| 13 | C | -1.08234000 | 2.12719400  | -4.20246000 |
| 14 | C | -1.34654000 | -0.11961500 | -0.56497500 |
| 15 | C | 3.53401200  | 0.81267300  | 0.02483100  |
| 16 | C | -0.63465100 | -0.79247800 | 2.37128400  |
| 17 | C | 2.43871800  | -0.17930400 | 2.76339400  |
| 18 | C | -0.37946900 | -2.54693700 | -5.97880700 |
| 19 | C | -2.01089500 | 0.20490900  | -6.38491400 |
| 20 | H | 2.26049700  | -1.63744700 | -2.94041200 |
| 21 | H | 2.05036100  | -2.56795700 | -4.45489100 |
| 22 | H | 0.99555700  | -2.90235200 | -3.05745300 |
| 23 | H | -0.26980300 | 2.83568300  | -3.98104700 |
| 24 | H | -1.81134500 | 2.16891000  | -3.37934800 |
| 25 | H | -1.59035000 | 2.42991900  | -5.13584100 |
| 26 | H | -1.49163300 | 0.60653300  | -1.37858400 |
| 27 | H | -1.51584600 | -1.13156600 | -0.96075600 |
| 28 | H | -2.10094600 | 0.07391300  | 0.21275400  |
| 29 | H | 4.22863600  | 0.03434200  | 0.37255000  |
| 30 | H | 3.68054300  | 0.97587000  | -1.05881200 |
| 31 | H | 3.76703000  | 1.74671200  | 0.55757800  |
| 32 | H | -0.08170600 | -0.96374500 | 3.31131500  |
| 33 | H | -1.10255800 | -1.74017000 | 2.07224600  |
| 34 | H | -1.43451300 | -0.06670200 | 2.57597700  |
| 35 | H | 3.29032100  | -0.86079600 | 2.62962500  |
| 36 | H | 1.78639600  | -0.59229900 | 3.55167900  |
| 37 | H | 2.82803600  | 0.78666200  | 3.11426400  |
| 38 | H | 0.56421500  | -2.75193100 | -6.50575900 |
| 39 | H | -0.60712600 | -3.41556700 | -5.34463200 |
| 40 | H | -1.17300000 | -2.46485900 | -6.73455900 |
| 41 | H | -1.65268900 | -0.07491400 | -7.38547500 |
| 42 | H | -2.94559400 | -0.34298200 | -6.20137600 |
| 43 | H | -2.24212600 | 1.28408700  | -6.39361200 |

Atomic positions used in the single-point B88PW91 calculation of **2f** from R<sub>1</sub> = Me, R<sub>2</sub> = Me.

|   |   |             |             |             |
|---|---|-------------|-------------|-------------|
| 1 | N | 0.00000000  | 0.00000000  | 0.00000000  |
| 2 | C | 0.30786400  | -0.29817700 | 1.35214800  |
| 3 | C | 1.65399300  | -0.03256800 | 1.52504400  |
| 4 | N | 2.14691800  | 0.40667100  | 0.27381900  |
| 5 | C | 1.13647200  | 0.42118100  | -0.66989100 |
| 6 | P | 1.53091300  | 1.09067700  | -2.36224200 |
| 7 | C | 0.40806500  | 0.16868700  | -3.57244000 |
| 8 | N | 0.57084800  | -1.10055600 | -4.09074300 |
| 9 | C | -0.29429500 | -1.30527600 | -5.18915100 |

# Supplementary Material (ESI) for Chemical Communications  
# This journal is © The Royal Society of Chemistry 2005

|    |   |             |             |             |
|----|---|-------------|-------------|-------------|
| 10 | C | -1.00128600 | -0.12451300 | -5.36143700 |
| 11 | N | -0.55848900 | 0.76380400  | -4.35520500 |
| 12 | H | -0.92616000 | -0.08383200 | -0.41904800 |
| 13 | H | -0.38400400 | -0.66616000 | 2.10978100  |
| 14 | H | 2.22493300  | -0.14074500 | 2.44722900  |
| 15 | H | 3.11407400  | 0.67550400  | 0.09288100  |
| 16 | H | 1.22543800  | -1.79488500 | -3.73043800 |
| 17 | H | -0.38773600 | -2.21349300 | -5.78455900 |
| 18 | H | -1.75248500 | 0.07886100  | -6.12461400 |
| 19 | H | -0.90601600 | 1.71402300  | -4.22594000 |

PM3 optimized atomic positions for R<sub>1</sub> = Et, R<sub>2</sub> = H.

|    |   |             |             |             |
|----|---|-------------|-------------|-------------|
| 1  | N | 0.00000000  | 0.00000000  | 0.00000000  |
| 2  | C | -0.04274900 | 0.94436900  | 1.04602600  |
| 3  | C | 1.13931500  | 1.64986500  | 0.99810000  |
| 4  | N | 1.87639500  | 1.13632500  | -0.08572300 |
| 5  | C | 1.17923900  | 0.12210900  | -0.71095300 |
| 6  | P | 1.97029400  | -0.91314200 | -2.07236700 |
| 7  | C | 0.71939100  | -0.84924900 | -3.48261500 |
| 8  | N | 0.23172800  | -1.99526900 | -4.07626300 |
| 9  | C | -0.52991300 | -1.67634600 | -5.21600400 |
| 10 | C | -0.51452400 | -0.30360200 | -5.33491200 |
| 11 | N | 0.26897100  | 0.19115000  | -4.27316200 |
| 12 | C | 0.48878600  | -3.37403400 | -3.59834300 |
| 13 | C | 0.57457500  | 1.62588400  | -4.06599700 |
| 14 | C | -1.08392600 | -0.96984100 | -0.27880100 |
| 15 | C | 3.21080400  | 1.62909200  | -0.50166600 |
| 16 | H | -0.88078400 | 1.04701500  | 1.74198800  |
| 17 | H | 1.49328700  | 2.45572100  | 1.64834800  |
| 18 | H | -1.01734800 | -2.42049200 | -5.85320200 |
| 19 | H | -0.98961000 | 0.32825800  | -6.09151100 |
| 20 | H | 1.19256300  | -3.29060500 | -2.73382800 |
| 21 | H | 1.02588600  | -3.92200200 | -4.40028400 |
| 22 | C | -0.78049200 | -4.10084000 | -3.20462900 |
| 23 | H | 1.31270700  | 1.69209200  | -3.23683300 |
| 24 | C | 1.11579800  | 2.30130500  | -5.31052500 |
| 25 | H | -0.35044800 | 2.13042600  | -3.71809900 |
| 26 | H | -0.73194000 | -1.64796200 | -1.08738300 |
| 27 | C | -1.48954100 | -1.77398900 | 0.94023200  |
| 28 | H | -1.95222300 | -0.40838300 | -0.68202600 |
| 29 | C | 4.25252300  | 1.51221800  | 0.59158700  |
| 30 | H | 3.09859900  | 2.68431300  | -0.82563800 |
| 31 | H | 3.50289400  | 1.03596300  | -1.40274900 |
| 32 | H | -0.53845200 | -5.12699300 | -2.89498400 |
| 33 | H | -1.49943400 | -4.17226800 | -4.03277000 |

# Supplementary Material (ESI) for Chemical Communications  
# This journal is © The Royal Society of Chemistry 2005

|    |   |             |             |             |
|----|---|-------------|-------------|-------------|
| 34 | H | -1.29161400 | -3.61951400 | -2.35865400 |
| 35 | H | 2.02625500  | 1.81696000  | -5.68953400 |
| 36 | H | 0.38279900  | 2.32152400  | -6.12961500 |
| 37 | H | 1.37420200  | 3.34533400  | -5.08393600 |
| 38 | H | -0.65464300 | -2.35044800 | 1.36164800  |
| 39 | H | -2.27288300 | -2.49338200 | 0.66406400  |
| 40 | H | -1.89771100 | -1.14461100 | 1.74392300  |
| 41 | H | 5.21663600  | 1.88810900  | 0.22180500  |
| 42 | H | 4.41253100  | 0.47419300  | 0.91269600  |
| 43 | H | 3.99297500  | 2.10130200  | 1.48246300  |

Atomic positions used in the single-point B88PW91 calculation of **2f** from R<sub>1</sub> = Et, R<sub>2</sub> = H.

|    |   |             |             |             |
|----|---|-------------|-------------|-------------|
| 1  | N | 0.00000000  | 0.00000000  | 0.00000000  |
| 2  | C | -0.04274900 | 0.94436900  | 1.04602600  |
| 3  | C | 1.13931500  | 1.64986500  | 0.99810000  |
| 4  | N | 1.87639500  | 1.13632500  | -0.08572300 |
| 5  | C | 1.17923900  | 0.12210900  | -0.71095300 |
| 6  | P | 1.97029400  | -0.91314200 | -2.07236700 |
| 7  | C | 0.71939100  | -0.84924900 | -3.48261500 |
| 8  | N | 0.23172800  | -1.99526900 | -4.07626300 |
| 9  | C | -0.52991300 | -1.67634600 | -5.21600400 |
| 10 | C | -0.51452400 | -0.30360200 | -5.33491200 |
| 11 | N | 0.26897100  | 0.19115000  | -4.27316200 |
| 12 | H | -0.73503200 | -0.67733000 | -0.20335300 |
| 13 | H | -0.85616500 | 1.08867600  | 1.75710300  |
| 14 | H | 1.44519600  | 2.45164400  | 1.67017700  |
| 15 | H | 2.79824100  | 1.46783500  | -0.36980300 |
| 16 | H | 0.39984600  | -2.94215100 | -3.73633600 |
| 17 | H | -1.03498400 | -2.38010100 | -5.87761600 |
| 18 | H | -1.01318900 | 0.28689500  | -6.10351300 |
| 19 | H | 0.47446200  | 1.17700700  | -4.11111200 |

PM3 optimized atomic positions for R<sub>1</sub> = Et, R<sub>2</sub> = Me.

|    |   |             |             |             |
|----|---|-------------|-------------|-------------|
| 1  | N | 0.00000000  | 0.00000000  | 0.00000000  |
| 2  | C | -0.04858800 | 0.93549700  | 1.06351100  |
| 3  | C | 1.14697100  | 1.63405200  | 1.03579900  |
| 4  | N | 1.89506000  | 1.11673700  | -0.04829000 |
| 5  | C | 1.18974400  | 0.12049100  | -0.69217400 |
| 6  | P | 1.98311400  | -0.87505500 | -2.08232300 |
| 7  | C | 0.70119800  | -0.85386200 | -3.47214100 |
| 8  | N | 0.22882000  | -2.01730200 | -4.04238300 |
| 9  | C | -0.54114500 | -1.72973400 | -5.19262400 |
| 10 | C | -0.54536100 | -0.35067900 | -5.33325700 |
| 11 | N | 0.23607000  | 0.16964000  | -4.27366800 |

# Supplementary Material (ESI) for Chemical Communications  
# This journal is © The Royal Society of Chemistry 2005

|    |   |             |             |             |
|----|---|-------------|-------------|-------------|
| 12 | C | 0.49666100  | -3.37700300 | -3.51832700 |
| 13 | C | 0.52012800  | 1.61109200  | -4.08628200 |
| 14 | C | -1.07942300 | -0.97168300 | -0.28742800 |
| 15 | C | 3.24611700  | 1.57971600  | -0.44424100 |
| 16 | C | -1.17752900 | 1.09745900  | 1.99822400  |
| 17 | C | 1.59075100  | 2.71736300  | 1.93243500  |
| 18 | C | -1.18767300 | -2.73801800 | -6.05284800 |
| 19 | C | -1.21735600 | 0.45813000  | -6.36723100 |
| 20 | H | 1.23265500  | -3.26187800 | -2.68480800 |
| 21 | H | 0.99753900  | -3.96108400 | -4.31825200 |
| 22 | C | -0.76027500 | -4.08237000 | -3.04873000 |
| 23 | H | 1.04924300  | 1.72928400  | -3.11723500 |
| 24 | C | 1.34486800  | 2.19945500  | -5.21558600 |
| 25 | H | -0.45207500 | 2.13964400  | -3.99684000 |
| 26 | H | -0.84623000 | -1.47070000 | -1.25223800 |
| 27 | C | -1.25032200 | -2.00253100 | 0.81249100  |
| 28 | H | -2.01991000 | -0.40041700 | -0.43437500 |
| 29 | C | 4.30078400  | 1.30865900  | 0.61082400  |
| 30 | H | 3.18074100  | 2.66611600  | -0.66049700 |
| 31 | H | 3.49473900  | 1.06042800  | -1.40207200 |
| 32 | H | -0.51260700 | -5.09783900 | -2.71155700 |
| 33 | H | -1.50848100 | -4.17593600 | -3.85540600 |
| 34 | H | -1.24084200 | -3.56728700 | -2.20484900 |
| 35 | H | 2.33665100  | 1.73496700  | -5.29796800 |
| 36 | H | 0.84115400  | 2.09044000  | -6.19236100 |
| 37 | H | 1.50017900  | 3.27294400  | -5.04428900 |
| 38 | H | -0.34555200 | -2.60503700 | 0.96977300  |
| 39 | H | -2.06239700 | -2.69489500 | 0.55266900  |
| 40 | H | -1.51249600 | -1.53205500 | 1.77667200  |
| 41 | H | 5.27505500  | 1.67803500  | 0.26344500  |
| 42 | H | 4.41725800  | 0.23837100  | 0.82743600  |
| 43 | H | 4.07302900  | 1.82110700  | 1.56192900  |
| 44 | H | -0.87735500 | 1.72386300  | 2.85139200  |
| 45 | H | -1.51867300 | 0.12207500  | 2.38881500  |
| 46 | H | -2.03404900 | 1.58225800  | 1.50778900  |
| 47 | H | 2.64174800  | 2.58140400  | 2.24303400  |
| 48 | H | 0.96555800  | 2.74441200  | 2.83693100  |
| 49 | H | 1.51004600  | 3.69649900  | 1.43897800  |
| 50 | H | -0.44225000 | -3.29632500 | -6.63772300 |
| 51 | H | -1.76146600 | -3.46737200 | -5.45377400 |
| 52 | H | -1.87596300 | -2.25327600 | -6.76012700 |
| 53 | H | -0.51069900 | 1.15796900  | -6.84801600 |
| 54 | H | -1.64152300 | -0.19247200 | -7.14560000 |
| 55 | H | -2.03818100 | 1.05117500  | -5.93941300 |

# Supplementary Material (ESI) for Chemical Communications  
# This journal is © The Royal Society of Chemistry 2005

Atomic positions used in the single-point B88PW91 calculation of **2f** from R<sub>1</sub> = Et, R<sub>2</sub> = Me.

|    |   |             |             |             |
|----|---|-------------|-------------|-------------|
| 1  | N | 0.00000000  | 0.00000000  | 0.00000000  |
| 2  | C | -0.04858800 | 0.93549700  | 1.06351100  |
| 3  | C | 1.14697100  | 1.63405200  | 1.03579900  |
| 4  | N | 1.89506000  | 1.11673700  | -0.04829000 |
| 5  | C | 1.18974400  | 0.12049100  | -0.69217400 |
| 6  | P | 1.98311400  | -0.87505500 | -2.08232300 |
| 7  | C | 0.70119800  | -0.85386200 | -3.47214100 |
| 8  | N | 0.22882000  | -2.01730200 | -4.04238300 |
| 9  | C | -0.54114500 | -1.72973400 | -5.19262400 |
| 10 | C | -0.54536100 | -0.35067900 | -5.33325700 |
| 11 | N | 0.23607000  | 0.16964000  | -4.27366800 |
| 12 | H | -0.73843800 | -0.66743600 | -0.22279800 |
| 13 | H | -0.86860000 | 1.07774600  | 1.76739000  |
| 14 | H | 1.45244800  | 2.42829500  | 1.71694600  |
| 15 | H | 2.82601900  | 1.43578000  | -0.31648200 |
| 16 | H | 0.40982100  | -2.95497400 | -3.68403900 |
| 17 | H | -1.03535300 | -2.45190900 | -5.84248700 |
| 18 | H | -1.05235100 | 0.22231600  | -6.10961900 |
| 19 | H | 0.42821500  | 1.16008100  | -4.12364500 |

PM3 optimized atomic positions for R<sub>1</sub> = <sup>i</sup>Pr, R<sub>2</sub> = H.

|    |   |             |             |             |
|----|---|-------------|-------------|-------------|
| 1  | N | 0.00000000  | 0.00000000  | 0.00000000  |
| 2  | C | 0.01380200  | 0.69383200  | 1.23044400  |
| 3  | C | 1.18878500  | 1.40546400  | 1.27917300  |
| 4  | N | 1.87653800  | 1.14089900  | 0.07783000  |
| 5  | C | 1.15551900  | 0.26841300  | -0.71501600 |
| 6  | P | 1.99010600  | -0.43714100 | -2.24285100 |
| 7  | C | 0.67909500  | -0.51244400 | -3.61000500 |
| 8  | N | 0.01546300  | -1.62378700 | -4.09061100 |
| 9  | C | -0.62571500 | -1.32399100 | -5.30630600 |
| 10 | C | -0.35856300 | -0.00004500 | -5.58568900 |
| 11 | N | 0.44978000  | 0.48074500  | -4.54111100 |
| 12 | C | -0.01634100 | -2.97155000 | -3.44169300 |
| 13 | C | 1.01262800  | 1.86408300  | -4.47904000 |
| 14 | C | -1.08759100 | -0.93735600 | -0.41394600 |
| 15 | C | 3.20077500  | 1.73763500  | -0.28162200 |
| 16 | H | -0.78992000 | 0.63959300  | 1.97085900  |
| 17 | H | 1.57292000  | 2.06143300  | 2.06634200  |
| 18 | H | -1.20745200 | -2.04774400 | -5.88580800 |
| 19 | H | -0.67888800 | 0.60527400  | -6.43957700 |
| 20 | H | 0.43360000  | -2.83281400 | -2.41066000 |
| 21 | C | 0.81748900  | -3.96983600 | -4.23555300 |
| 22 | C | -1.44900900 | -3.47202500 | -3.29434000 |

# Supplementary Material (ESI) for Chemical Communications  
# This journal is © The Royal Society of Chemistry 2005

|    |   |             |             |             |
|----|---|-------------|-------------|-------------|
| 23 | C | 1.85321400  | 2.16731500  | -5.71399200 |
| 24 | C | -0.09765700 | 2.89497400  | -4.31852800 |
| 25 | H | 1.67606300  | 1.86583000  | -3.56759000 |
| 26 | C | -0.73000300 | -2.37482300 | -0.04661500 |
| 27 | C | -2.43619400 | -0.55264400 | 0.18118300  |
| 28 | H | -1.15633600 | -0.85402400 | -1.52964800 |
| 29 | C | 4.27046100  | 1.34855000  | 0.73101500  |
| 30 | C | 3.09264400  | 3.25358600  | -0.39308200 |
| 31 | H | 3.45504800  | 1.29895900  | -1.29123700 |
| 32 | H | 1.86961500  | -3.66443100 | -4.31401300 |
| 33 | H | 0.80120900  | -4.94975400 | -3.73860200 |
| 34 | H | 0.43195900  | -4.11530200 | -5.25486400 |
| 35 | H | -1.45318800 | -4.43174700 | -2.75795400 |
| 36 | H | -1.93924300 | -3.64264700 | -4.26330700 |
| 37 | H | -2.07571000 | -2.77726700 | -2.71655700 |
| 38 | H | 1.26171500  | 2.14217600  | -6.64065300 |
| 39 | H | 2.68995300  | 1.46546200  | -5.83196800 |
| 40 | H | 2.28489400  | 3.17492700  | -5.63244800 |
| 41 | H | -0.78596900 | 2.90384000  | -5.17608000 |
| 42 | H | -0.69480400 | 2.72990200  | -3.41206900 |
| 43 | H | 0.33721700  | 3.90145300  | -4.24209000 |
| 44 | H | 0.11330000  | -2.74985800 | -0.65447100 |
| 45 | H | -1.58443300 | -3.03846600 | -0.24461100 |
| 46 | H | -0.46722200 | -2.48941900 | 1.01315400  |
| 47 | H | -2.48290100 | -0.73106900 | 1.26549100  |
| 48 | H | -3.22938700 | -1.16180200 | -0.27589800 |
| 49 | H | -2.69242400 | 0.50042000  | 0.00255800  |
| 50 | H | 5.24203400  | 1.75861500  | 0.42174000  |
| 51 | H | 4.39078000  | 0.26011400  | 0.81459200  |
| 52 | H | 4.05712800  | 1.74126100  | 1.73568200  |
| 53 | H | 4.06251200  | 3.67523700  | -0.69200400 |
| 54 | H | 2.81311600  | 3.72494400  | 0.56004900  |
| 55 | H | 2.35735900  | 3.56224500  | -1.14865400 |

Atomic positions used in the single-point B88PW91 calculation of **2f** from R<sub>1</sub> = <sup>i</sup>Pr, R<sub>2</sub> = H.

|    |   |             |             |             |
|----|---|-------------|-------------|-------------|
| 1  | N | 0.00000000  | 0.00000000  | 0.00000000  |
| 2  | C | 0.01380200  | 0.69383200  | 1.23044400  |
| 3  | C | 1.18878500  | 1.40546400  | 1.27917300  |
| 4  | N | 1.87653800  | 1.14089900  | 0.07783000  |
| 5  | C | 1.15551900  | 0.26841300  | -0.71501600 |
| 6  | P | 1.99010600  | -0.43714100 | -2.24285100 |
| 7  | C | 0.67909500  | -0.51244400 | -3.61000500 |
| 8  | N | 0.01546300  | -1.62378700 | -4.09061100 |
| 9  | C | -0.62571500 | -1.32399100 | -5.30630600 |
| 10 | C | -0.35856300 | -0.00004500 | -5.58568900 |



# Supplementary Material (ESI) for Chemical Communications  
# This journal is © The Royal Society of Chemistry 2005

|    |   |             |             |             |
|----|---|-------------|-------------|-------------|
| 11 | N | 0.44978000  | 0.48074500  | -4.54111100 |
| 12 | H | -0.75291900 | -0.61101300 | -0.31650500 |
| 13 | H | -0.76108500 | 0.66947200  | 1.99664000  |
| 14 | H | 1.52425300  | 2.05062200  | 2.09116600  |
| 15 | H | 2.78192500  | 1.53868100  | -0.17205700 |
| 16 | H | -0.00673000 | -2.53332700 | -3.62947800 |
| 17 | H | -1.22037100 | -2.00774800 | -5.91207900 |
| 18 | H | -0.70722600 | 0.56480600  | -6.45025700 |
| 19 | H | 0.81584200  | 1.43080600  | -4.47960700 |

PM3 optimized atomic positions for R<sub>1</sub> = <sup>i</sup>Pr, R<sub>2</sub> = Me.

|    |   |             |             |             |
|----|---|-------------|-------------|-------------|
| 1  | N | 0.00000000  | 0.00000000  | 0.00000000  |
| 2  | C | 0.31938800  | -0.37431800 | 1.33123800  |
| 3  | C | 1.67163800  | -0.14226100 | 1.50106900  |
| 4  | N | 2.16243400  | 0.34364100  | 0.26568400  |
| 5  | C | 1.14108200  | 0.41942900  | -0.66191300 |
| 6  | P | 1.50533700  | 1.16520400  | -2.34714500 |
| 7  | C | 0.46987500  | 0.16347300  | -3.57816300 |
| 8  | N | 0.65271200  | -1.11446000 | -4.06440800 |
| 9  | C | -0.22331100 | -1.35051700 | -5.14670400 |
| 10 | C | -0.95392300 | -0.18583600 | -5.33860400 |
| 11 | N | -0.50414800 | 0.73878400  | -4.37160700 |
| 12 | C | 1.57771300  | -2.13127100 | -3.47762700 |
| 13 | C | -1.04367900 | 2.11089800  | -4.11508800 |
| 14 | C | -1.37274300 | -0.08034100 | -0.58371100 |
| 15 | C | 3.58801400  | 0.71360900  | -0.00577900 |
| 16 | C | -0.61495100 | -0.91922000 | 2.33393600  |
| 17 | C | 2.46725600  | -0.35795300 | 2.72401700  |
| 18 | C | -0.33451600 | -2.60261300 | -5.91803600 |
| 19 | C | -2.00389300 | 0.01761800  | -6.35448600 |
| 20 | H | 2.11668700  | -1.60734100 | -2.64256400 |
| 21 | C | 2.60236900  | -2.60240200 | -4.50293200 |
| 22 | C | 0.77836900  | -3.30466800 | -2.91884100 |
| 23 | C | -1.04976000 | 2.97440700  | -5.36702500 |
| 24 | C | -2.43031300 | 2.01850100  | -3.48974100 |
| 25 | H | -0.32694000 | 2.55741000  | -3.36128300 |
| 26 | C | -1.83341400 | -1.53297200 | -0.65112400 |
| 27 | C | -2.36158100 | 0.77404000  | 0.20341300  |
| 28 | H | -1.32001000 | 0.34783800  | -1.62660000 |
| 29 | C | 4.49714400  | -0.49904900 | 0.16072200  |
| 30 | C | 4.03406700  | 1.85738700  | 0.89846000  |
| 31 | H | 3.60651500  | 1.05381100  | -1.08243900 |
| 32 | H | 3.25162700  | -1.78452600 | -4.84273800 |
| 33 | H | 3.25007500  | -3.37210900 | -4.06202800 |
| 34 | H | 2.12577300  | -3.04383500 | -5.39631500 |
| 35 | H | 1.45248900  | -4.05236500 | -2.48131000 |

# Supplementary Material (ESI) for Chemical Communications  
# This journal is © The Royal Society of Chemistry 2005

|    |   |             |             |             |
|----|---|-------------|-------------|-------------|
| 36 | H | 0.18830900  | -3.80987600 | -3.70533100 |
| 37 | H | 0.07423100  | -2.99109700 | -2.12854100 |
| 38 | H | -1.44572300 | 3.97083200  | -5.12738000 |
| 39 | H | -1.68229400 | 2.55402900  | -6.16759200 |
| 40 | H | -0.04130400 | 3.11420400  | -5.77853900 |
| 41 | H | -3.17431900 | 1.58305400  | -4.17168000 |
| 42 | H | -2.41567300 | 1.41018600  | -2.56667500 |
| 43 | H | -2.78787800 | 3.02016100  | -3.21589400 |
| 44 | H | -1.16778200 | -2.15422700 | -1.27543200 |
| 45 | H | -2.84134600 | -1.59602500 | -1.08157100 |
| 46 | H | -1.87269900 | -1.99569400 | 0.35182200  |
| 47 | H | -2.42421100 | 0.47683600  | 1.26491800  |
| 48 | H | -3.36803800 | 0.67393200  | -0.22585400 |
| 49 | H | -2.09874400 | 1.84007200  | 0.17231600  |
| 50 | H | 5.54363900  | -0.21215500 | -0.00863900 |
| 51 | H | 4.25784300  | -1.29482000 | -0.55674300 |
| 52 | H | 4.43273100  | -0.93073300 | 1.17561300  |
| 53 | H | 3.45974700  | 2.77590600  | 0.71992800  |
| 54 | H | 5.09051200  | 2.09405200  | 0.71296500  |
| 55 | H | 3.93413900  | 1.60150200  | 1.96825100  |
| 56 | H | -0.06612100 | -1.14802300 | 3.26138000  |
| 57 | H | -1.09787600 | -1.84091100 | 1.96495800  |
| 58 | H | -1.41768700 | -0.19809000 | 2.56594200  |
| 59 | H | 3.28423700  | -1.07814300 | 2.54150300  |
| 60 | H | 1.81816600  | -0.74719900 | 3.52400600  |
| 61 | H | 2.93277500  | 0.58423400  | 3.06284700  |
| 62 | H | 0.63582300  | -2.88418900 | -6.36323500 |
| 63 | H | -0.65087400 | -3.43739100 | -5.26827600 |
| 64 | H | -1.07218200 | -2.47237100 | -6.72587700 |
| 65 | H | -1.87175100 | 0.96680900  | -6.90052900 |
| 66 | H | -1.97311700 | -0.81585200 | -7.07639100 |
| 67 | H | -3.00453300 | 0.03098700  | -5.89815100 |

Atomic positions used in the single-point B88PW91 calculation of **2f** from R<sub>1</sub> = <sup>i</sup>Pr, R<sub>2</sub> = Me.

|    |   |             |             |             |
|----|---|-------------|-------------|-------------|
| 1  | N | 0.00000000  | 0.00000000  | 0.00000000  |
| 2  | C | 0.31938800  | -0.37431800 | 1.33123800  |
| 3  | C | 1.67163800  | -0.14226100 | 1.50106900  |
| 4  | N | 2.16243400  | 0.34364100  | 0.26568400  |
| 5  | C | 1.14108200  | 0.41942900  | -0.66191300 |
| 6  | P | 1.50533700  | 1.16520400  | -2.34714500 |
| 7  | C | 0.46987500  | 0.16347300  | -3.57816300 |
| 8  | N | 0.65271200  | -1.11446000 | -4.06440800 |
| 9  | C | -0.22331100 | -1.35051700 | -5.14670400 |
| 10 | C | -0.95392300 | -0.18583600 | -5.33860400 |
| 11 | N | -0.50414800 | 0.73878400  | -4.37160700 |

# Supplementary Material (ESI) for Chemical Communications  
# This journal is © The Royal Society of Chemistry 2005

|    |   |             |             |             |
|----|---|-------------|-------------|-------------|
| 12 | H | -0.93370500 | -0.03493500 | -0.40911500 |
| 13 | H | -0.36998900 | -0.76939900 | 2.07740800  |
| 14 | H | 2.24897700  | -0.30270800 | 2.41158300  |
| 15 | H | 3.13275600  | 0.60139800  | 0.08558200  |
| 16 | H | 1.32247500  | -1.78991900 | -3.69620700 |
| 17 | H | -0.30941900 | -2.27224200 | -5.72212500 |
| 18 | H | -1.72527900 | -0.01793700 | -6.09021600 |
| 19 | H | -0.84844900 | 1.69381900  | -4.27278800 |

PM3 optimized atomic positions for R<sub>1</sub> = <sup>t</sup>Bu, R<sub>2</sub> = H.

|    |   |             |             |             |
|----|---|-------------|-------------|-------------|
| 1  | N | 0.00000000  | 0.00000000  | 0.00000000  |
| 2  | C | -0.06952800 | 0.93254300  | 1.05321100  |
| 3  | C | 1.09417100  | 1.65849100  | 1.02966300  |
| 4  | N | 1.86959500  | 1.17632400  | -0.04349100 |
| 5  | C | 1.18024400  | 0.17409100  | -0.71721700 |
| 6  | P | 1.97466500  | -0.81997100 | -2.16857100 |
| 7  | C | 0.79617900  | -0.92236700 | -3.70814500 |
| 8  | N | 0.35633300  | -2.10858000 | -4.27736400 |
| 9  | C | -0.32212000 | -1.84569000 | -5.48583900 |
| 10 | C | -0.27741600 | -0.49295300 | -5.69663000 |
| 11 | N | 0.42588800  | 0.07143800  | -4.61401300 |
| 12 | C | 0.42197500  | -3.56461400 | -3.82896800 |
| 13 | C | 0.81648200  | 1.54200100  | -4.62707900 |
| 14 | C | -1.03771700 | -1.09538000 | -0.15768600 |
| 15 | C | 3.28516900  | 1.68189200  | -0.28611400 |
| 16 | H | -0.91133500 | 1.02872200  | 1.74688800  |
| 17 | H | 1.39347100  | 2.46638000  | 1.70592300  |
| 18 | H | -0.76229200 | -2.63892900 | -6.10659300 |
| 19 | H | -0.69101100 | 0.06971300  | -6.54039400 |
| 20 | C | 1.56679100  | -3.83559300 | -2.85944400 |
| 21 | C | 0.64120900  | -4.45763500 | -5.06316400 |
| 22 | C | -0.92601400 | -3.92742400 | -3.19378100 |
| 23 | C | 2.33708700  | 1.62517600  | -4.79951900 |
| 24 | C | 0.17339200  | 2.28003100  | -5.81127700 |
| 25 | C | 0.35239800  | 2.23414700  | -3.33907600 |
| 26 | C | -0.32727800 | -2.45314700 | -0.12039700 |
| 27 | C | -2.05528600 | -1.07307600 | 0.99212900  |
| 28 | C | -1.80791100 | -0.89727400 | -1.46906500 |
| 29 | C | 4.25216400  | 0.49298100  | -0.28211600 |
| 30 | C | 3.72022200  | 2.65434500  | 0.81870400  |
| 31 | C | 3.35161200  | 2.41318400  | -1.62806000 |
| 32 | H | 1.60695700  | -4.26325300 | -5.54957800 |
| 33 | H | 0.63441600  | -5.51518800 | -4.76447700 |
| 34 | H | -0.14919900 | -4.32704800 | -5.82157100 |
| 35 | H | -0.91122000 | -4.96792100 | -2.84064200 |

# Supplementary Material (ESI) for Chemical Communications  
# This journal is © The Royal Society of Chemistry 2005

|    |   |             |             |             |
|----|---|-------------|-------------|-------------|
| 36 | H | -1.75413000 | -3.84027200 | -3.91161900 |
| 37 | H | -1.17751800 | -3.29443500 | -2.31893000 |
| 38 | H | 2.66701700  | 1.18975700  | -5.75296100 |
| 39 | H | 2.87024200  | 1.10125200  | -3.98336800 |
| 40 | H | 2.66805300  | 2.67342100  | -4.79169600 |
| 41 | H | 0.50724500  | 1.89207800  | -6.78472600 |
| 42 | H | -0.92528400 | 2.24865400  | -5.78867800 |
| 43 | H | 0.46327000  | 3.34047900  | -5.77781200 |
| 44 | H | 0.60463300  | -2.45880200 | -0.72396200 |
| 45 | H | -0.97832300 | -3.23998900 | -0.53871900 |
| 46 | H | -0.06223100 | -2.75217900 | 0.90257800  |
| 47 | H | -1.58881700 | -1.24141500 | 1.97355600  |
| 48 | H | -2.78559700 | -1.88145100 | 0.84292900  |
| 49 | H | -2.62374800 | -0.13309500 | 1.04283300  |
| 50 | H | 5.26045700  | 0.82547700  | -0.56467600 |
| 51 | H | 3.95149200  | -0.28750900 | -1.00685000 |
| 52 | H | 4.32820600  | 0.02641800  | 0.70951100  |
| 53 | H | 4.76234000  | 2.96263600  | 0.64750300  |
| 54 | H | 3.68824000  | 2.20148500  | 1.82001700  |
| 55 | H | 3.11650700  | 3.57263100  | 0.83373800  |
| 56 | H | 1.51083200  | -4.86980300 | -2.49124400 |
| 57 | H | 1.54526400  | -3.16345200 | -1.97865200 |
| 58 | H | 2.54846800  | -3.71594300 | -3.34025900 |
| 59 | H | 1.11897000  | 2.93972400  | -2.96735800 |
| 60 | H | 0.16100600  | 1.52530500  | -2.52040300 |
| 61 | H | -0.57471000 | 2.80630100  | -3.48765300 |
| 62 | H | -1.19331600 | -0.45057600 | -2.26310000 |
| 63 | H | -2.16549000 | -1.86935300 | -1.85331000 |
| 64 | H | -2.68604700 | -0.24940900 | -1.33868900 |
| 65 | H | 4.25315600  | 3.03861700  | -1.68523100 |
| 66 | H | 3.39754700  | 1.69610700  | -2.46840000 |
| 67 | H | 2.48127000  | 3.06831600  | -1.81106700 |

Atomic positions used in the single-point B88PW91 calculation of **2f** from R<sub>1</sub> = <sup>t</sup>Bu, R<sub>2</sub> = H.

|    |   |             |             |             |
|----|---|-------------|-------------|-------------|
| 1  | N | 0.00000000  | 0.00000000  | 0.00000000  |
| 2  | C | -0.06952800 | 0.93254300  | 1.05321100  |
| 3  | C | 1.09417100  | 1.65849100  | 1.02966300  |
| 4  | N | 1.86959500  | 1.17632400  | -0.04349100 |
| 5  | C | 1.18024400  | 0.17409100  | -0.71721700 |
| 6  | P | 1.97466500  | -0.81997100 | -2.16857100 |
| 7  | C | 0.79617900  | -0.92236700 | -3.70814500 |
| 8  | N | 0.35633300  | -2.10858000 | -4.27736400 |
| 9  | C | -0.32212000 | -1.84569000 | -5.48583900 |
| 10 | C | -0.27741600 | -0.49295300 | -5.69663000 |
| 11 | N | 0.42588800  | 0.07143800  | -4.61401300 |

# Supplementary Material (ESI) for Chemical Communications  
# This journal is © The Royal Society of Chemistry 2005

|    |   |             |             |             |
|----|---|-------------|-------------|-------------|
| 12 | H | -0.71125100 | -0.70115500 | -0.20713100 |
| 13 | H | -0.89395000 | 1.05459800  | 1.75572900  |
| 14 | H | 1.36846800  | 2.46056800  | 1.71488900  |
| 15 | H | 2.80028100  | 1.51313200  | -0.29003300 |
| 16 | H | 0.50236700  | -3.03642700 | -3.87965300 |
| 17 | H | -0.79531900 | -2.58385100 | -6.13337300 |
| 18 | H | -0.70524200 | 0.04534300  | -6.54238600 |
| 19 | H | 0.63431200  | 1.06426900  | -4.50796900 |

PM3 optimized atomic positions for R<sub>1</sub> = Mes, R<sub>2</sub> = H.

|    |   |             |             |             |
|----|---|-------------|-------------|-------------|
| 1  | N | 0.00000000  | 0.00000000  | 0.00000000  |
| 2  | C | 0.08917500  | 1.15847000  | 0.79891300  |
| 3  | C | 1.29789700  | 1.74866600  | 0.51399500  |
| 4  | N | 1.92487900  | 0.95121200  | -0.46513800 |
| 5  | C | 1.12900300  | -0.13494000 | -0.79321400 |
| 6  | P | 1.77437500  | -1.60823100 | -1.79657800 |
| 7  | C | 0.61417300  | -2.00946300 | -3.24243600 |
| 8  | N | 0.13910500  | -3.28863900 | -3.48424100 |
| 9  | C | -0.43265700 | -3.37159900 | -4.77013100 |
| 10 | C | -0.32456400 | -2.12433800 | -5.33866600 |
| 11 | N | 0.32559700  | -1.29939100 | -4.39779300 |
| 12 | C | 0.21247100  | -4.48281000 | -2.65661300 |
| 13 | C | 0.66141000  | 0.06795200  | -4.75784600 |
| 14 | C | -1.13378500 | -0.89497900 | 0.15849800  |
| 15 | C | 3.26577000  | 1.29163100  | -0.91516500 |
| 16 | C | -0.96614600 | -5.00209800 | -2.08917800 |
| 17 | C | -0.89705400 | -6.18041000 | -1.34804400 |
| 18 | C | 0.31485900  | -6.84770100 | -1.17065300 |
| 19 | C | 1.47491500  | -6.32646700 | -1.74003100 |
| 20 | C | 1.44034100  | -5.14785800 | -2.48518000 |
| 21 | C | -0.36531800 | 1.02306000  | -4.88596100 |
| 22 | C | -0.04312900 | 2.31301200  | -5.30073300 |
| 23 | C | 1.27364500  | 2.65970900  | -5.60722900 |
| 24 | C | 2.27925400  | 1.70275200  | -5.49264800 |
| 25 | C | 1.99085500  | 0.40336900  | -5.07123000 |
| 26 | C | 4.36763300  | 0.53803400  | -0.47029300 |
| 27 | C | 5.65188300  | 0.91611000  | -0.86225200 |
| 28 | C | 5.85194500  | 2.02499200  | -1.68161700 |
| 29 | C | 4.75240700  | 2.76613700  | -2.11489100 |
| 30 | C | 3.45654200  | 2.41644500  | -1.73941400 |
| 31 | C | -2.40301100 | -0.49562400 | -0.30037700 |
| 32 | C | -3.49493300 | -1.33501000 | -0.09010800 |
| 33 | C | -3.34609700 | -2.54871900 | 0.58202900  |
| 34 | C | -2.09003700 | -2.92155500 | 1.05652600  |
| 35 | C | -0.97497400 | -2.10689800 | 0.85496600  |

# Supplementary Material (ESI) for Chemical Communications  
# This journal is © The Royal Society of Chemistry 2005

|    |   |             |             |             |
|----|---|-------------|-------------|-------------|
| 36 | C | -2.63122200 | 0.80789200  | -0.97935600 |
| 37 | H | -4.48933600 | -1.03226800 | -0.44527800 |
| 38 | C | -4.51482800 | -3.44390600 | 0.77775800  |
| 39 | H | -1.97585400 | -3.86930400 | 1.60022400  |
| 40 | C | 0.34069300  | -2.54953700 | 1.38616400  |
| 41 | C | -2.29184100 | -4.34538200 | -2.24809400 |
| 42 | H | -1.81067200 | -6.59459900 | -0.90104100 |
| 43 | C | 0.36127800  | -8.11376200 | -0.39623600 |
| 44 | H | 2.42977100  | -6.85173600 | -1.60141700 |
| 45 | C | 2.70931500  | -4.63354600 | -3.06674200 |
| 46 | C | -1.79310200 | 0.70206500  | -4.61924700 |
| 47 | H | -0.83608300 | 3.06625200  | -5.40279900 |
| 48 | C | 1.59148300  | 4.03461800  | -6.06980000 |
| 49 | H | 3.31460200  | 1.97070300  | -5.74404600 |
| 50 | C | 3.10268400  | -0.57796500 | -4.97221800 |
| 51 | C | 4.21037500  | -0.65751100 | 0.40079000  |
| 52 | H | 6.51637100  | 0.33189200  | -0.51854500 |
| 53 | C | 7.22192700  | 2.43158000  | -2.08491300 |
| 54 | H | 4.91506700  | 3.64133200  | -2.75781800 |
| 55 | C | 2.33155700  | 3.25412900  | -2.23510800 |
| 56 | H | -0.68322900 | 1.47193400  | 1.50732900  |
| 57 | H | 1.74083900  | 2.65462100  | 0.93844700  |
| 58 | H | -0.86139100 | -4.28691600 | -5.18880900 |
| 59 | H | -0.64758800 | -1.78596900 | -6.32757100 |
| 60 | H | -2.31567600 | 1.65018900  | -0.34664600 |
| 61 | H | -3.69241100 | 0.96507200  | -1.21912000 |
| 62 | H | -2.07262200 | 0.87038400  | -1.92795500 |
| 63 | H | -4.44068300 | -4.01422800 | 1.71361500  |
| 64 | H | -4.57178800 | -4.16784400 | -0.04923400 |
| 65 | H | -5.46153500 | -2.88846000 | 0.80128000  |
| 66 | H | 0.69608200  | -1.87437800 | 2.17706100  |
| 67 | H | 0.29176400  | -3.55817500 | 1.81885200  |
| 68 | H | 1.10024400  | -2.56986000 | 0.58140300  |
| 69 | H | -2.48850600 | -4.05027100 | -3.28816800 |
| 70 | H | -3.11501200 | -5.00819000 | -1.94197600 |
| 71 | H | -2.35882400 | -3.44361600 | -1.61772600 |
| 72 | H | 1.35649000  | -8.30061000 | 0.02900000  |
| 73 | H | 0.11422100  | -8.96486100 | -1.04627700 |
| 74 | H | -0.35994800 | -8.11073800 | 0.43204400  |
| 75 | H | 3.57647000  | -5.23376600 | -2.75727400 |
| 76 | H | 2.89818100  | -3.59315100 | -2.73979300 |
| 77 | H | 2.68155800  | -4.64783100 | -4.16483300 |
| 78 | H | -2.13735400 | -0.14569000 | -5.22892000 |
| 79 | H | -1.95398700 | 0.44382700  | -3.55932800 |
| 80 | H | -2.45343200 | 1.55089200  | -4.84736200 |
| 81 | H | 2.64542800  | 4.29313400  | -5.89974500 |

# Supplementary Material (ESI) for Chemical Communications  
# This journal is © The Royal Society of Chemistry 2005

|    |   |            |             |             |
|----|---|------------|-------------|-------------|
| 82 | H | 1.39692000 | 4.12784400  | -7.14746000 |
| 83 | H | 0.97674600 | 4.78649200  | -5.55657900 |
| 84 | H | 4.08036800 | -0.11080800 | -5.15419200 |
| 85 | H | 2.98710500 | -1.38500800 | -5.70853900 |
| 86 | H | 3.13534500 | -1.03259400 | -3.96312700 |
| 87 | H | 5.17171000 | -1.15099300 | 0.60019500  |
| 88 | H | 3.77574600 | -0.39079900 | 1.37409900  |
| 89 | H | 3.54959400 | -1.40619100 | -0.07674700 |
| 90 | H | 7.97206500 | 1.66690900  | -1.84282200 |
| 91 | H | 7.27779700 | 2.62321000  | -3.16501500 |
| 92 | H | 7.51369800 | 3.35729000  | -1.56930300 |
| 93 | H | 2.68072400 | 4.23870800  | -2.57875600 |
| 94 | H | 1.56963600 | 3.43733000  | -1.46516500 |
| 95 | H | 1.83926400 | 2.76992400  | -3.09448800 |

Atomic positions used in the single-point B88PW91 calculation of **2f** from R<sub>1</sub> = Mes, R<sub>2</sub> = H.

|    |   |             |             |             |
|----|---|-------------|-------------|-------------|
| 1  | N | 0.00000000  | 0.00000000  | 0.00000000  |
| 2  | C | 0.08917500  | 1.15847000  | 0.79891300  |
| 3  | C | 1.29789700  | 1.74866600  | 0.51399500  |
| 4  | N | 1.92487900  | 0.95121200  | -0.46513800 |
| 5  | C | 1.12900300  | -0.13494000 | -0.79321400 |
| 6  | P | 1.77437500  | -1.60823100 | -1.79657800 |
| 7  | C | 0.61417300  | -2.00946300 | -3.24243600 |
| 8  | N | 0.13910500  | -3.28863900 | -3.48424100 |
| 9  | C | -0.43265700 | -3.37159900 | -4.77013100 |
| 10 | C | -0.32456400 | -2.12433800 | -5.33866600 |
| 11 | N | 0.32559700  | -1.29939100 | -4.39779300 |
| 12 | H | -0.78669200 | -0.64922300 | 0.00499000  |
| 13 | H | -0.65753800 | 1.51755100  | 1.50713600  |
| 14 | H | 1.69581200  | 2.66000200  | 0.96034800  |
| 15 | H | 2.83806300  | 1.14665500  | -0.87537900 |
| 16 | H | 0.19537300  | -4.06326300 | -2.82303600 |
| 17 | H | -0.87615200 | -4.25635300 | -5.22688400 |
| 18 | H | -0.67464600 | -1.82949800 | -6.32791400 |
| 19 | H | 0.55227500  | -0.31610000 | -4.54663900 |

Figure S3. Space-filling picture of the PM3 optimized structure of **2** where  $R_1 = \text{tBu}$  and  $R_2 = \text{H}$ , showing the steric overcrowding of the putative molecule.

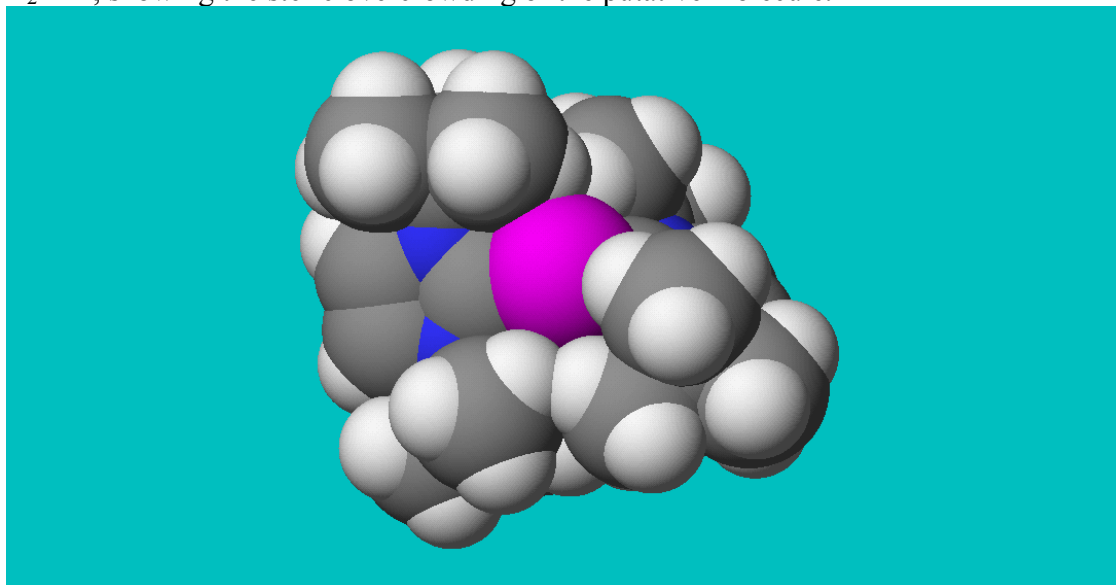

#### References:

- 1 B. D. Ellis, M. Carlesimo and C. L. B. Macdonald, *Chem. Commun.*, 2003, 1946-1947.
- 2 M. J. Frisch, G. W. Trucks, H. B. Schlegel, G. E. Scuseria, M. A. Robb, J. R. Cheeseman, V. G. Zakrzewski, J. A. Montgomery, Jr., R. E. Stratmann, J. C. Burant, S. Dapprich, J. M. Millam, A. D. Daniels, K. N. Kudin, M. C. Strain, O. Farkas, J. Tomasi, V. Barone, M. Cossi, R. Cammi, B. Mennucci, C. Pomelli, C. Adamo, S. Clifford, J. Ochterski, G. A. Petersson, P. Y. Ayala, Q. Cui, K. Morokuma, P. Salvador, J. J. Dannenberg, D. K. Malick, A. D. Rabuck, K. Raghavachari, J. B. Foresman, J. Cioslowski, J. V. Ortiz, A. G. Baboul, B. B. Stefanov, G. Liu, A. Liashenko, P. Piskorz, I. Komaromi, R. Gomperts, R. L. Martin, D. J. Fox, T. Keith, M. A. Al-Laham, C. Y. Peng, A. Nanayakkara, M. Challacombe, P. M. W. Gill, B. Johnson, W. Chen, M. W. Wong, J. L. Andres, C. Gonzalez, M. Head-Gordon, E. S. Replogle and J. A. Pople Gaussian 98 A.11.1; Gaussian Inc., Pittsburg, 2001.
- 3 A. D. Becke, *Journal of Chemical Physics*, 1993, **98**, 5648-5652.
- 4 J. P. Perdew and Y. Wang, *Physical Review B*, 1992, **45**, 13244-13249.
- 5 E. D. Glendening, A. E. Reed, J. E. Carpenter and R. Weinhold NBO 3.1;
- 6 A. E. Reed, L. A. Curtiss and F. Weinhold, *Chemical Reviews*, 1988, **88**, 899-926.
- 7 G. Schaftenaar MOLDEN 3.4; CAOS/CAMM Center Nijmegen: Toernooiveld, Nijmegen, The Netherlands, 1991.
- 8 *CAChe Worksystem Pro*; Version 6.1.10, CAChe Group, Fujitsu, Beaverton, OR
